# Supplementary material
Source: PubMed Central journal article supplement (PMC6449216)
Supplement: NIHMS1520798-supplement-1.pdf [file NIHMS1520798-supplement-1.pdf]

## **SUPPLEMENTARY MATERIAL**

### **The microbiome in lung cancer tissue and recurrence-free survival**

Brandilyn A. Peters,<sup>a</sup> Richard B. Hayes,<sup>a,b</sup> Chandra Goparaju,<sup>c</sup> Christopher Reid,<sup>c</sup> Harvey I. Pass,<sup>b,c</sup> Jiyoun Ahn<sup>a,b</sup>

<sup>a</sup>Department of Population Health, NYU School of Medicine, New York, NY, USA

<sup>b</sup>NYU Perlmutter Cancer Center, New York, NY, USA

<sup>c</sup>Department of Cardiothoracic Surgery, NYU School of Medicine, New York, NY, USA

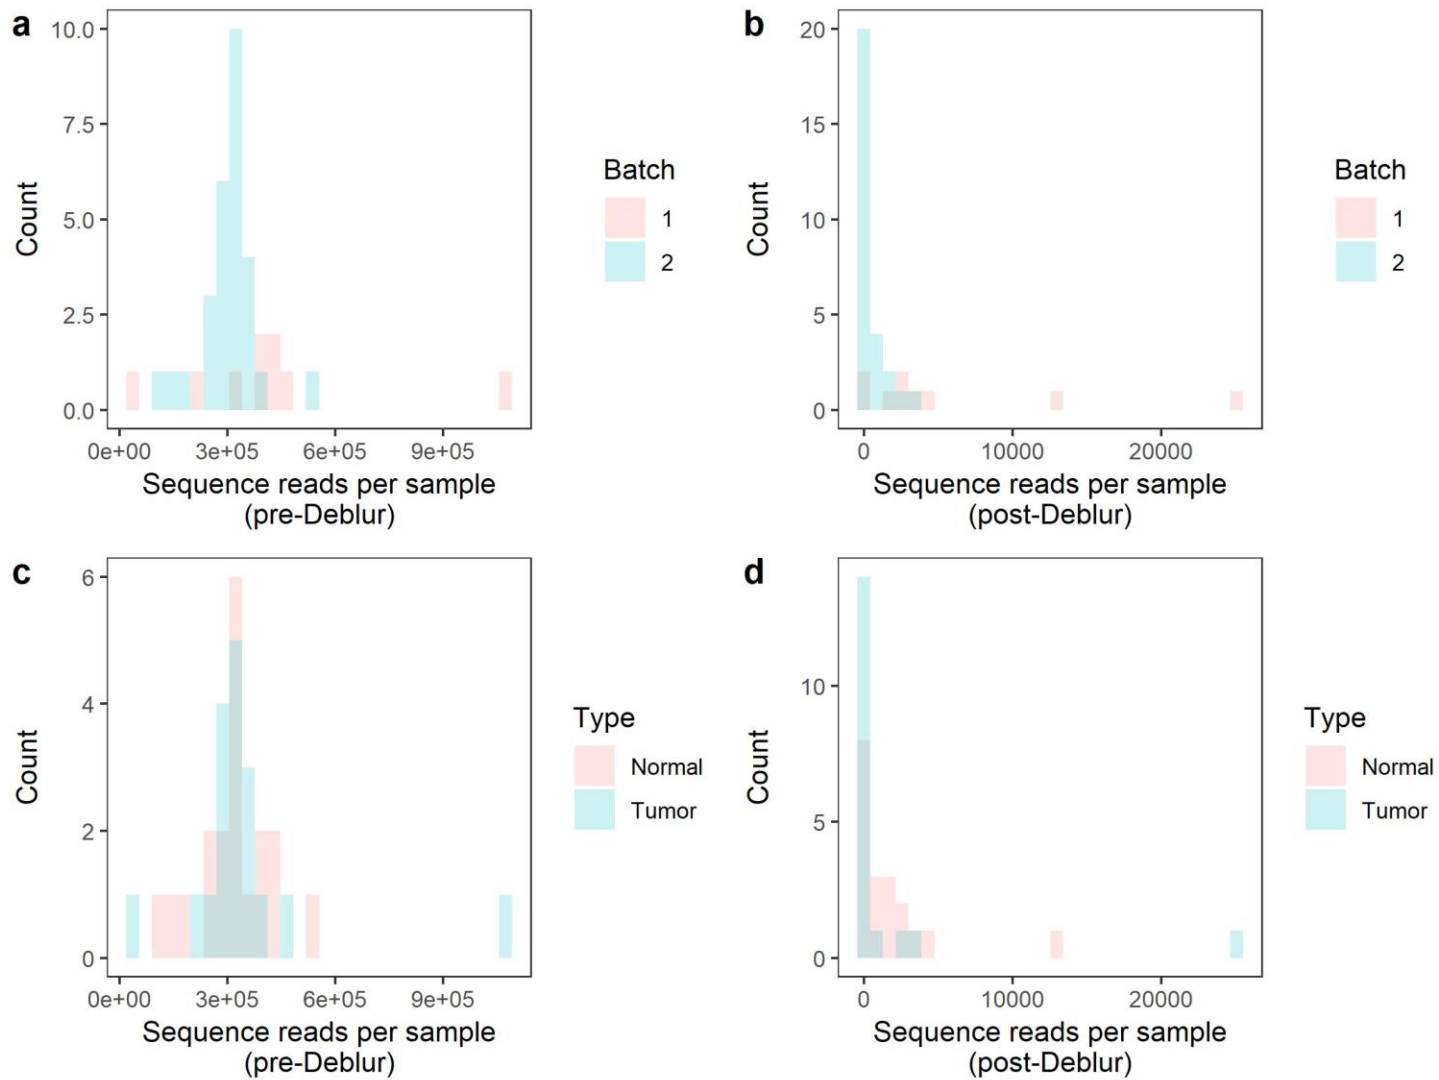

**Supplementary Figure 1.** Histograms of the number of sequence reads per sample (a-b) by batch pre- and post-Deblur and (c-d) by sample tissue type pre- and post-Deblur.

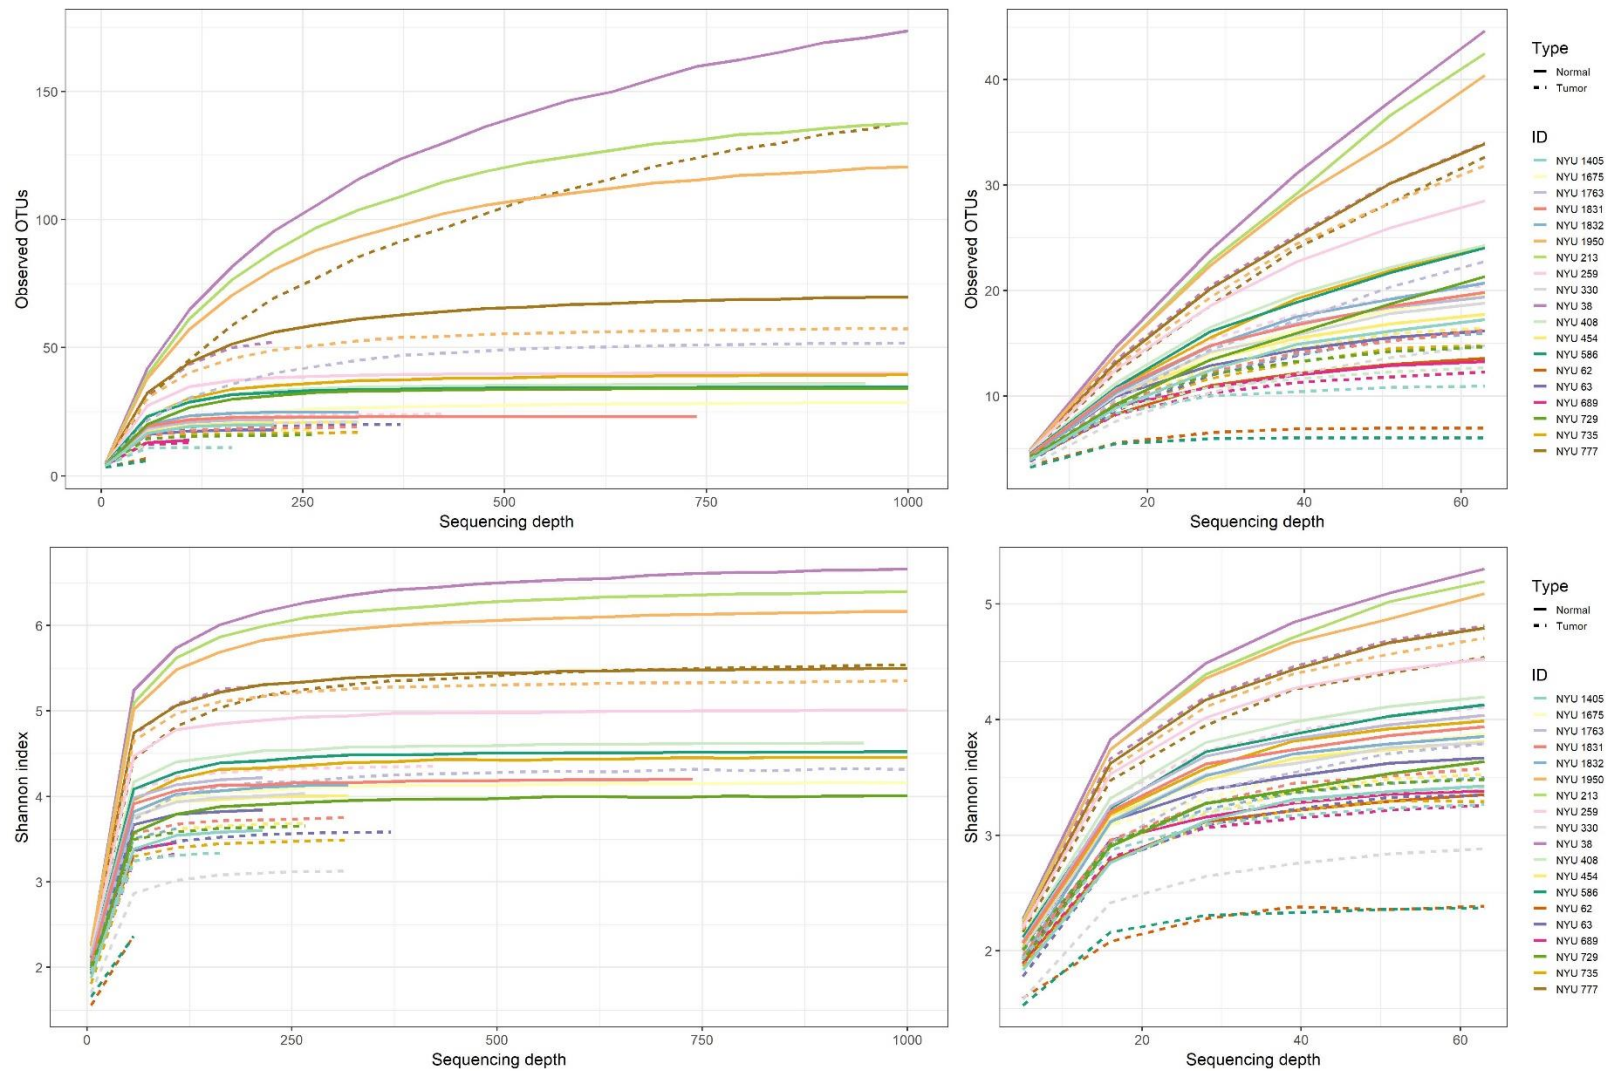

**Supplementary Figure 2.** Rarefaction curves of number of observed OTUs (top) and Shannon index (bottom) in paired lung tumor and normal samples. Left panel shows depth up to 1000 sequence reads per sample. Right panel shows depth up to 63 sequences per sample (lowest observed depth among the samples).

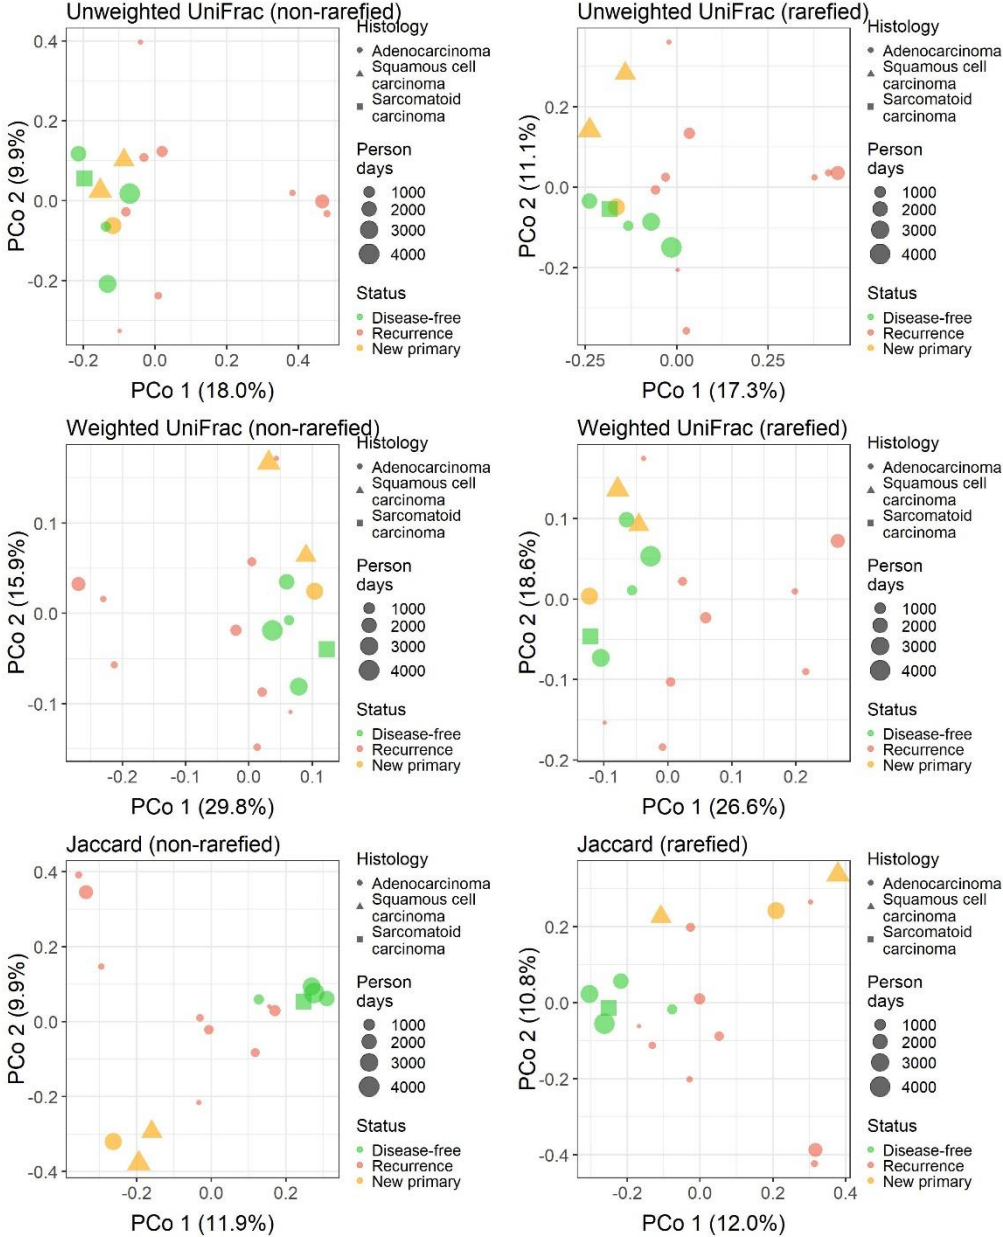

**Supplementary Figure 3.  $\beta$ -diversity in normal lung tissue and survival.** Principal coordinate analysis of the unweighted UniFrac distance, weighted UniFrac distance, and Jaccard index (non-rarefied and rarefied to an even depth of 63 sequence reads per sample), with samples annotated according to recurrence status, histology, and person days.

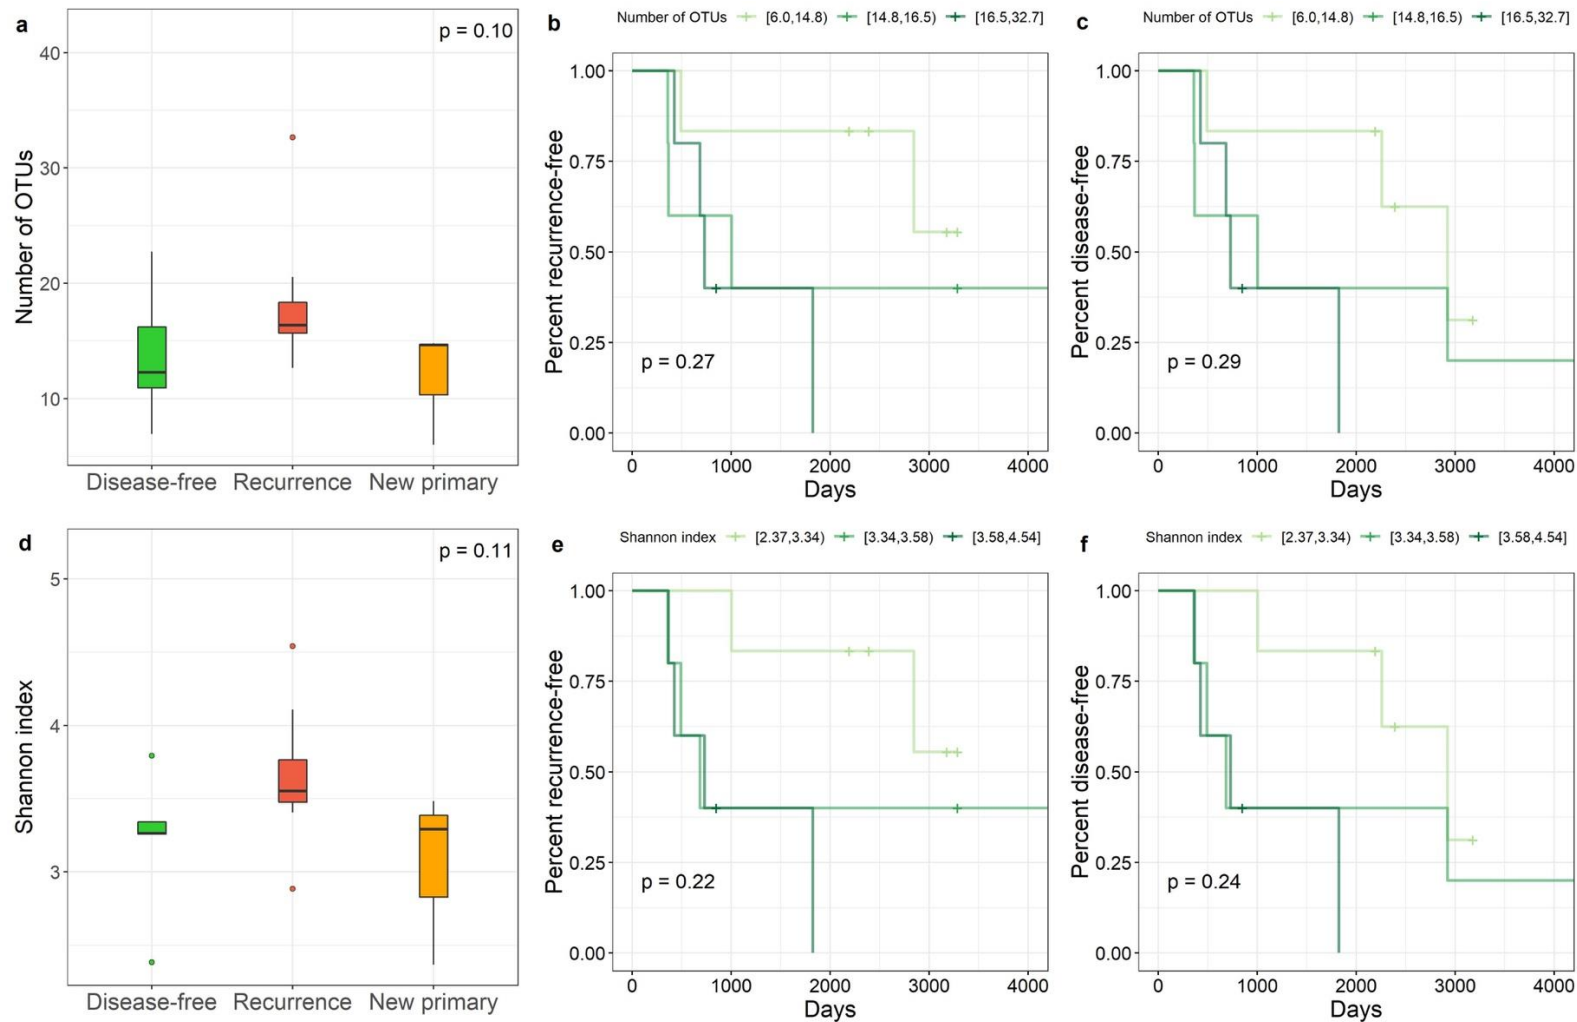

**Supplementary Figure 4.  $\alpha$ -diversity in tumor lung tissue and survival.** Boxplots show distribution of (a) number of OTUs and (d) Shannon index at an even depth of 63 sequence reads per sample in tumor lung tissue by disease status of patients ( $p$ -values are from Kruskal-Wallis tests). Kaplan-Meier plots show recurrence-free and disease-free survival curves for patients grouped in tertiles of (b-c) number of OTUs and (e-f) Shannon index at an even depth of 63 sequence reads per sample in tumor lung tissue ( $p$ -values are from log-rank tests for trend).

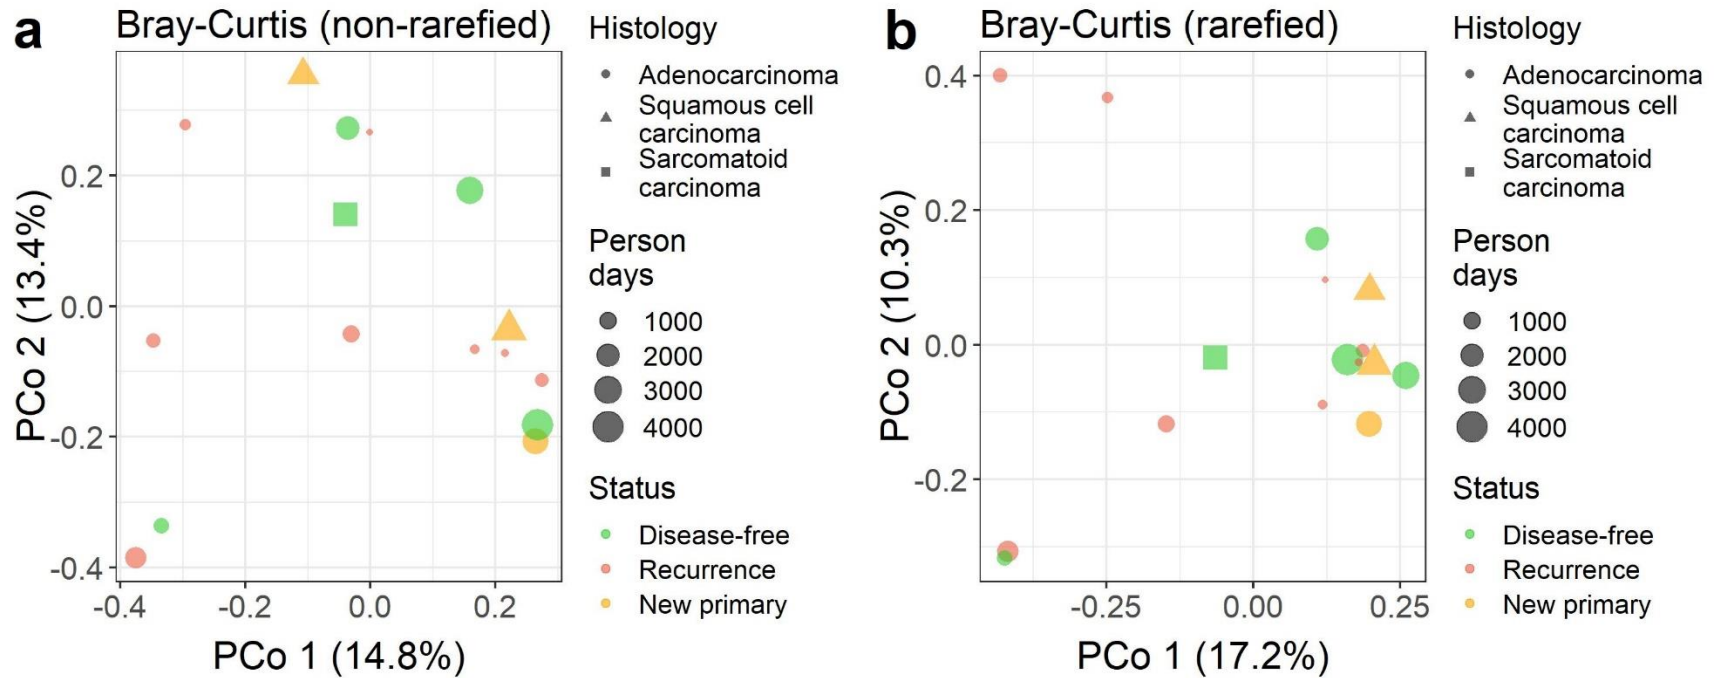

**Supplementary Figure 5.  $\beta$ -diversity in tumor lung tissue according to lung cancer recurrence status.** Principal coordinate analysis of the Bray-Curtis dissimilarity, with samples annotated according to recurrence status, histology, and person days. (a) non-rarefied, (b) rarefied to an even depth of 63 sequence reads per sample.

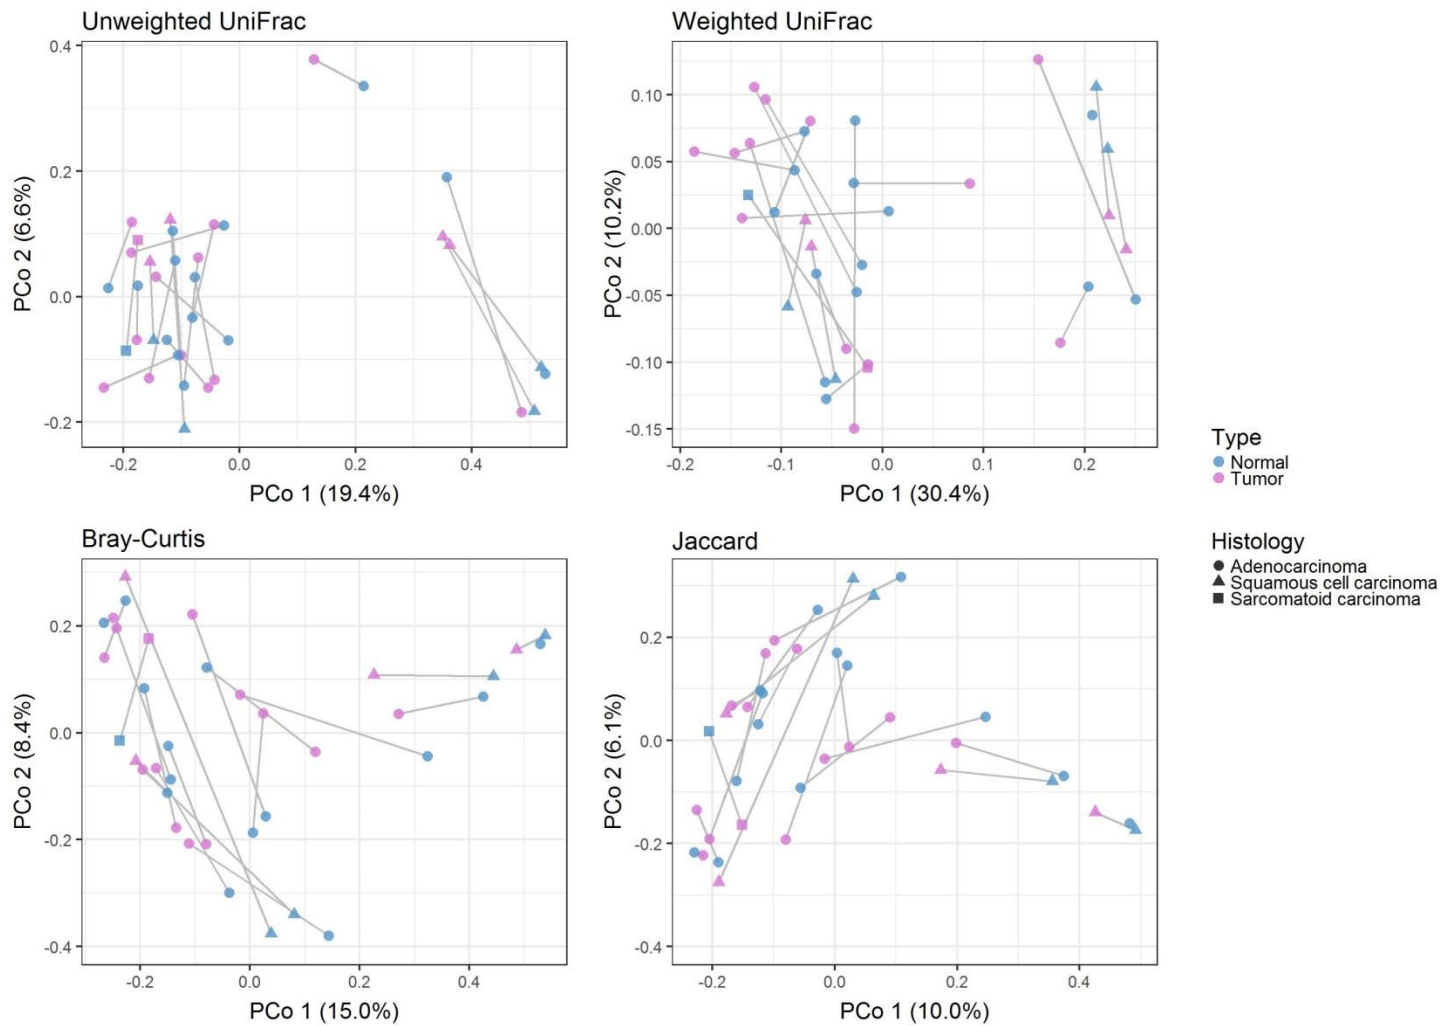

**Supplementary Figure 6.** Principal coordinate analysis of unweighted and weighted UniFrac distances, Bray-Curtis dissimilarity, and Jaccard index. Gray lines connecting normal (blue) and tumor (purple) samples indicate samples from the same individual.

**Supplementary Table 1.** Number of sequence reads<sup>a</sup> in paired lung tumor and normal samples.

| ID       | Recurrence or new primary | Histology               | Extraction batch <sup>c</sup> | Number of sequence reads |       |
|----------|---------------------------|-------------------------|-------------------------------|--------------------------|-------|
|          |                           |                         |                               | Normal                   | Tumor |
| NYU 330  | Recurrence                | Adenocarcinoma          | 2                             | 308                      | 366   |
| NYU 454  | Recurrence                | Adenocarcinoma          | 2                             | 350                      | 302   |
| NYU 1832 | Recurrence                | Adenocarcinoma          | 2                             | 357                      | 131   |
| NYU 1831 | Recurrence                | Adenocarcinoma          | 2                             | 773                      | 332   |
| NYU 408  | Recurrence                | Adenocarcinoma          | 2                             | 968                      | 107   |
| NYU 259  | Recurrence                | Adenocarcinoma          | 2                             | 1106                     | 471   |
| NYU 586  | New primary               | Squamous cell carcinoma | 2                             | 1601                     | 63    |
| NYU 729  | New primary               | Squamous cell carcinoma | 2                             | 1617                     | 271   |
| NYU 777  | Recurrence                | Adenocarcinoma          | 1                             | 1907                     | 25140 |
| NYU 735  | New primary               | Adenocarcinoma          | 2                             | 2360                     | 351   |
| NYU 213  | Recurrence                | Adenocarcinoma          | 1                             | 3306                     | NA    |
| NYU 1675 | Recurrence                | Adenocarcinoma          | 1                             | 4279                     | 253   |
| NYU 62   | No                        | Adenocarcinoma          | 2                             | 95                       | 103   |
| NYU 689  | No                        | Adenocarcinoma          | 2                             | 155                      | 124   |
| NYU 1763 | No                        | Adenocarcinoma          | 2                             | 218                      | 3033  |
| NYU 63   | No                        | Adenocarcinoma          | 2                             | 232                      | 406   |
| NYU 1405 | No                        | Sarcomatoid carcinoma   | 2                             | 245                      | 175   |
| NYU 1950 | Missing <sup>b</sup>      | Squamous cell carcinoma | 1                             | 2415                     | 2379  |
| NYU 38   | Missing <sup>b</sup>      | Squamous cell carcinoma | 1                             | 12666                    | 262   |

<sup>a</sup>Number of reads determined after Deblur workflow.

<sup>b</sup>No follow up due to postoperative death.

<sup>c</sup>Samples were extracted/amplified in two batches (batch 1 = 10 samples and batch 2 = 28 samples); all samples were sequenced in one batch on the Illumina MiSeq.



**Supplementary Table 2.** Relation of lung tissue  $\alpha$ -diversity<sup>a</sup> with lung cancer recurrence-free and disease-free survival.

|                                 | Disease-free<br>(n=5) | Median              |                      | P-value <sup>b</sup> | Recurrence-free survival |                      | Disease-free survival    |                      |
|---------------------------------|-----------------------|---------------------|----------------------|----------------------|--------------------------|----------------------|--------------------------|----------------------|
|                                 |                       | Recurrence<br>(n=9) | New primary<br>(n=3) |                      | HR <sup>c</sup> (95% CI) | P-value <sup>c</sup> | HR <sup>c</sup> (95% CI) | P-value <sup>c</sup> |
| <b>Normal tissue</b>            |                       |                     |                      |                      |                          |                      |                          |                      |
| Number of OTUs                  | 16.19                 | 20.73               | 24.04                | 0.01                 | 1.07 (0.99, 1.16)        | 0.08                 | 1.09 (1.01, 1.17)        | 0.03                 |
| Shannon index                   | 3.43                  | 3.94                | 3.99                 | 0.06                 | 3.60 (1.10, 11.81)       | 0.03                 | 3.97 (1.24, 12.70)       | 0.02                 |
| <b>Tumor tissue<sup>d</sup></b> |                       |                     |                      |                      |                          |                      |                          |                      |
| Number of OTUs                  | 12.27                 | 16.37               | 14.65                | 0.10                 | 1.04 (0.96, 1.14)        | 0.35                 | 1.05 (0.96, 1.14)        | 0.28                 |
| Shannon index                   | 3.26                  | 3.55                | 3.29                 | 0.11                 | 1.87 (0.62, 5.67)        | 0.27                 | 2.08 (0.72, 6.05)        | 0.18                 |

<sup>a</sup>Number of OTUs and Shannon index were obtained by averaging over 100 iterations at a common depth of 63 sequences per sample.

<sup>b</sup>Kruskal-Wallis test comparing  $\alpha$ -diversity index between disease-free and recurrence or new primary groups.

<sup>c</sup> $\alpha$ -diversity index used as predictor in Cox proportional hazards model.

<sup>d</sup>One subject with recurrence was missing tumor data; results for normal tissue were similar when excluding that subject.

**Supplementary Table 3.** Sensitivity analyses for association of  $\alpha$ - and  $\beta$ -diversity with recurrence-free and disease-free survival.

|                               | Adenocarcinoma only <sup>a</sup> |             | Batch 2 only <sup>b</sup> |              | Non-smokers only <sup>c</sup> |             | Stage I-II only <sup>a</sup> |             | $\geq 124$ reads/sample only <sup>d</sup> |             |
|-------------------------------|----------------------------------|-------------|---------------------------|--------------|-------------------------------|-------------|------------------------------|-------------|-------------------------------------------|-------------|
|                               | RFS                              | DFS         | RFS                       | DFS          | RFS                           | DFS         | RFS                          | DFS         | RFS                                       | DFS         |
| <b>Normal tissue</b>          |                                  |             |                           |              |                               |             |                              |             |                                           |             |
| Shannon index <sup>e</sup>    | 2.49 (0.13)                      | 2.73 (0.09) | 9.67 (0.05)               | 11.75 (0.03) | 4.10 (0.04)                   | 4.68 (0.02) | 5.53 (0.02)                  | 6.20 (0.01) | 2.51 (0.08)                               | 2.65 (0.06) |
| Weighted UniFrac <sup>f</sup> | 0.09                             | 0.08        | 0.10                      | 0.07         | 0.01                          | 0.02        | 0.02                         | 0.03        | 0.05                                      | 0.07        |
| Bray-Curtis <sup>f</sup>      | 0.10                             | 0.03        | 0.15                      | 0.04         | 0.09                          | 0.01        | 0.11                         | 0.02        | 0.19                                      | 0.13        |
| <b>Tumor tissue</b>           |                                  |             |                           |              |                               |             |                              |             |                                           |             |
| Shannon index <sup>e</sup>    | 1.82 (0.30)                      | 1.93 (0.25) | 2.04 (0.41)               | 2.55 (0.26)  | 2.65 (0.23)                   | 2.79 (0.20) | 1.62 (0.48)                  | 1.91 (0.31) | 1.65 (0.42)                               | 1.66 (0.42) |
| Weighted UniFrac <sup>f</sup> | 0.79                             | 0.73        | 0.47                      | 0.56         | 0.80                          | 0.72        | 0.82                         | 0.63        | 0.79                                      | 0.68        |
| Bray-Curtis <sup>f</sup>      | 0.99                             | 0.99        | 0.79                      | 0.89         | 0.97                          | 0.97        | 0.74                         | 0.78        | 0.99                                      | 0.99        |

<sup>a</sup>Normal tissue n=14, tumor tissue n=13.

<sup>b</sup>Normal tissue n=14, tumor tissue n=14.

<sup>c</sup>Normal tissue n=15, tumor tissue n=14.

<sup>d</sup>Normal tissue n=16, tumor tissue n=13.

<sup>e</sup>Values are HR (p) from Cox model; Shannon index obtained by averaging over 100 iterations at a common depth of 63 (or 124 for  $\geq 124$  reads/sample analysis) sequences per sample.

<sup>f</sup>Values are P-values from the community-level test of association between the microbiota and survival times (MiRKAT-S). Bray-Curtis dissimilarity based on non-rarefied data.

**Supplementary Table 4.** Relation of lung tissue  $\beta$ -diversity<sup>a</sup> with lung cancer recurrence-free and disease-free survival.

|                                                        | Recurrence-free survival<br>P-value | Disease-free survival<br>P-value |
|--------------------------------------------------------|-------------------------------------|----------------------------------|
| <b>Normal tissue (non-rarefied)</b>                    |                                     |                                  |
| MiRKAT-S (unweighted UniFrac)                          | 0.02                                | 0.04                             |
| MiRKAT-S (weighted UniFrac)                            | 0.03                                | 0.04                             |
| MiRKAT-S (Bray-Curtis)                                 | 0.09                                | 0.02                             |
| MiRKAT-S (Jaccard)                                     | 0.08                                | 0.02                             |
| OMiSA                                                  | 0.20                                | 0.12                             |
| <b>Normal tissue (rarefied<sup>b</sup>)</b>            |                                     |                                  |
| MiRKAT-S (unweighted UniFrac)                          | 0.005                               | 0.02                             |
| MiRKAT-S (weighted UniFrac)                            | 0.02                                | 0.03                             |
| MiRKAT-S (Bray-Curtis)                                 | 0.22                                | 0.09                             |
| MiRKAT-S (Jaccard)                                     | 0.19                                | 0.06                             |
| OMiSA                                                  | 0.07                                | 0.07                             |
| <b>Tumor<sup>c</sup> tissue (non-rarefied)</b>         |                                     |                                  |
| MiRKAT-S (unweighted UniFrac)                          | 0.70                                | 0.66                             |
| MiRKAT-S (weighted UniFrac)                            | 0.73                                | 0.64                             |
| MiRKAT-S (Bray-Curtis)                                 | 0.95                                | 0.95                             |
| MiRKAT-S (Jaccard)                                     | 0.95                                | 0.95                             |
| OMiSA                                                  | 0.64                                | 0.48                             |
| <b>Tumor<sup>c</sup> tissue (rarefied<sup>b</sup>)</b> |                                     |                                  |
| MiRKAT-S (unweighted UniFrac)                          | 0.54                                | 0.57                             |
| MiRKAT-S (weighted UniFrac)                            | 0.60                                | 0.56                             |
| MiRKAT-S (Bray-Curtis)                                 | 0.56                                | 0.65                             |
| MiRKAT-S (Jaccard)                                     | 0.48                                | 0.60                             |
| OMiSA                                                  | 0.56                                | 0.39                             |

<sup>a</sup> $\beta$ -diversity was assessed by unweighted and weighted UniFrac phylogenetic distances, Bray-Curtis dissimilarity, and the Jaccard index. P-values were obtained by the community-level test of association between the microbiota and survival times (MiRKAT-S) and the optimal microbiome-based survival analysis test (OMiSA), all with 10,000 permutations.

<sup>b</sup>OTU table rarefied to an even depth of 63 sequences per sample prior to calculating distances.

<sup>c</sup>One subject with recurrence was missing tumor data; results for normal tissue were similar when excluding that subject.

**Supplementary Table 6.**  $\alpha$ - and  $\beta$ -diversity in relation to lung tumor and normal tissue type.

|                                                          | Median           |                 | P-value <sup>a</sup> |
|----------------------------------------------------------|------------------|-----------------|----------------------|
|                                                          | Normal<br>(n=18) | Tumor<br>(n=18) |                      |
| $\alpha$ -diversity <sup>b</sup>                         |                  |                 |                      |
| Number of OTUs                                           | 20.73            | 16.08           | 0.0001               |
| Shannon index                                            | 3.94             | 3.49            | <0.0001              |
| $\beta$ -diversity <sup>c</sup> (non-rarefied)           |                  |                 |                      |
| Unweighted UniFrac                                       | NA               | NA              | 0.17                 |
| Weighted UniFrac                                         | NA               | NA              | 0.26                 |
| Bray-Curtis                                              | NA               | NA              | 0.07                 |
| Jaccard                                                  | NA               | NA              | 0.07                 |
| $\beta$ -diversity <sup>c</sup> (rarefied <sup>d</sup> ) |                  |                 |                      |
| Unweighted UniFrac                                       | NA               | NA              | 0.16                 |
| Weighted UniFrac                                         | NA               | NA              | 0.58                 |
| Bray-Curtis                                              | NA               | NA              | 0.43                 |
| Jaccard                                                  | NA               | NA              | 0.45                 |

<sup>a</sup>Wilcoxon signed-rank paired test was used for comparing  $\alpha$ -diversity index between paired tumor and normal tissue; permutational multivariate analysis of variance with tissue pair as strata and 10,000 permutations was used for  $\beta$ -diversity.

<sup>b</sup>Number of OTUs and Shannon index were obtained by averaging over 100 iterations at a common depth of 63 sequences per sample.

<sup>c</sup> $\beta$ -diversity was assessed by unweighted and weighted UniFrac phylogenetic distances, Bray-Curtis dissimilarity, and the Jaccard index.

<sup>d</sup>OTU table rarefied to an even depth of 63 sequences per sample prior to calculating distances.
